# Supplementary material for: Diabetes incidence and glucose intolerance prevalence increase with higher outdoor temperature
Source: PubMed Central journal article supplement — BMJ Open Diabetes Res Care. 2017 Feb 20;5(1):e000317. doi: 10.1136/bmjdrc-2016-000317 (PMC5372132; doi:10.1136/bmjdrc-2016-000317), 2017-02-20
Supplement: bmjdrc-2016-000317supp_figures.pdf [file bmjdrc-2016-000317supp_figures.pdf]

**Supplemental figure 1: The association between mean annual temperature and obesity prevalence in the United States of America over the period 1996-2009. The forest plot represents the difference<sup>a,b</sup> in obesity prevalence per 1°C increase in temperature.**

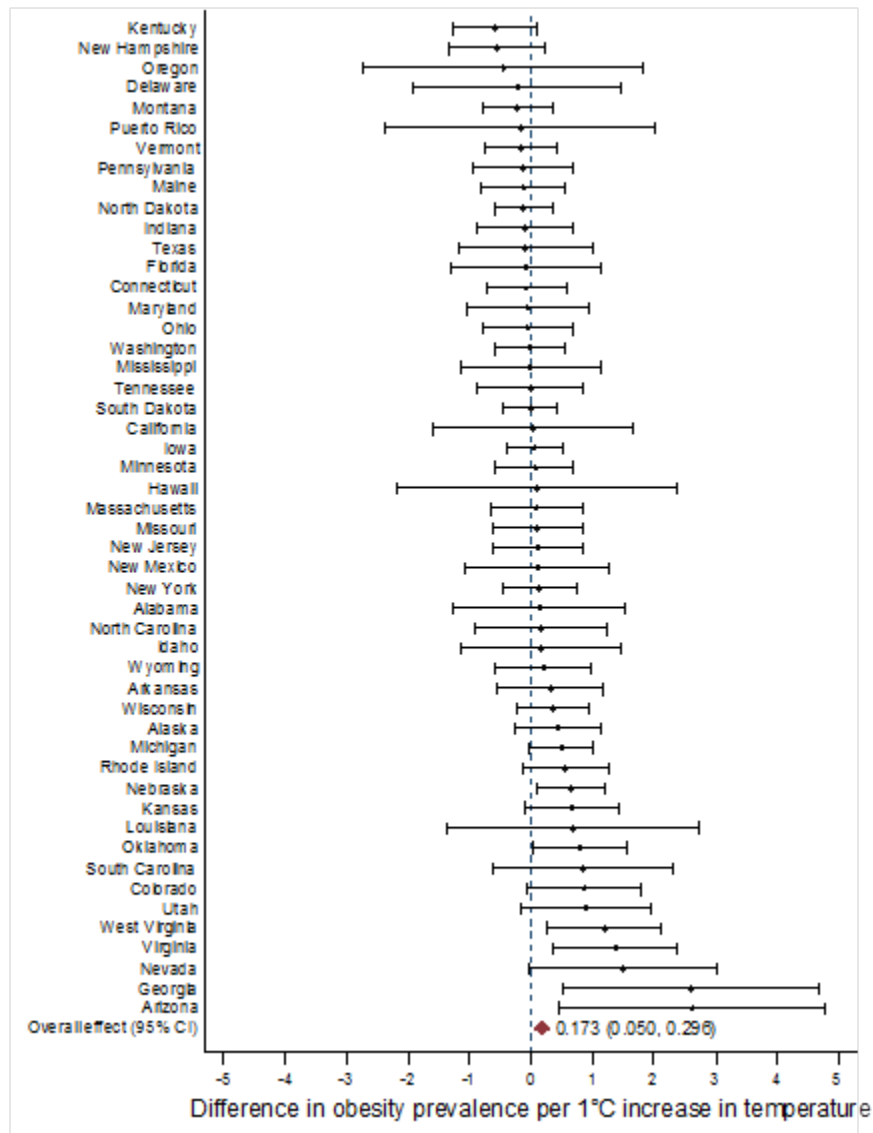

<sup>a</sup> Beta coefficient from meta-regression analysis. Error bars represent 95% CI. <sup>b</sup> Adjusted for the effect of time passage. Obesity prevalence is expressed as percentage.

**Supplemental figure 2: The association between mean annual temperature and diabetes incidence in the United States of America over the period 1996-2009, adjusted for obesity prevalence. The forest plot represents the difference<sup>a,b</sup> in diabetes incidence rate per 1°C increase in temperature.**

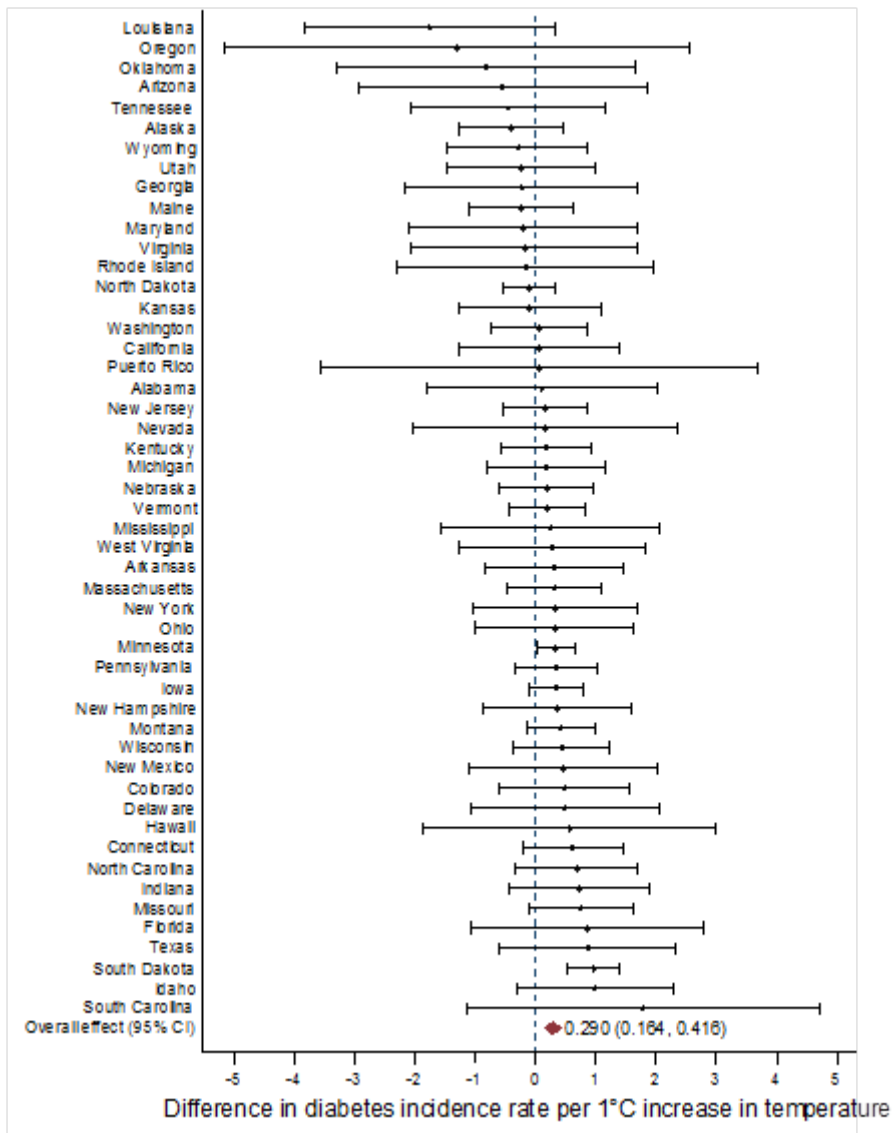

<sup>a</sup> Beta coefficient from meta-regression analysis. Error bars represent 95% CI. <sup>b</sup> Adjusted for the effect of time passage. Diabetes incidence rate is the age-adjusted diabetes incidence rate per 1000.

**Supplemental figure 3: The worldwide association between mean annual temperature and age-, sex-, income- and obesity-adjusted prevalence of raised fasting blood glucose, for 161 countries in 2014, after exclusion of countries with a prevalence of raised fasting blood glucose >15%.**

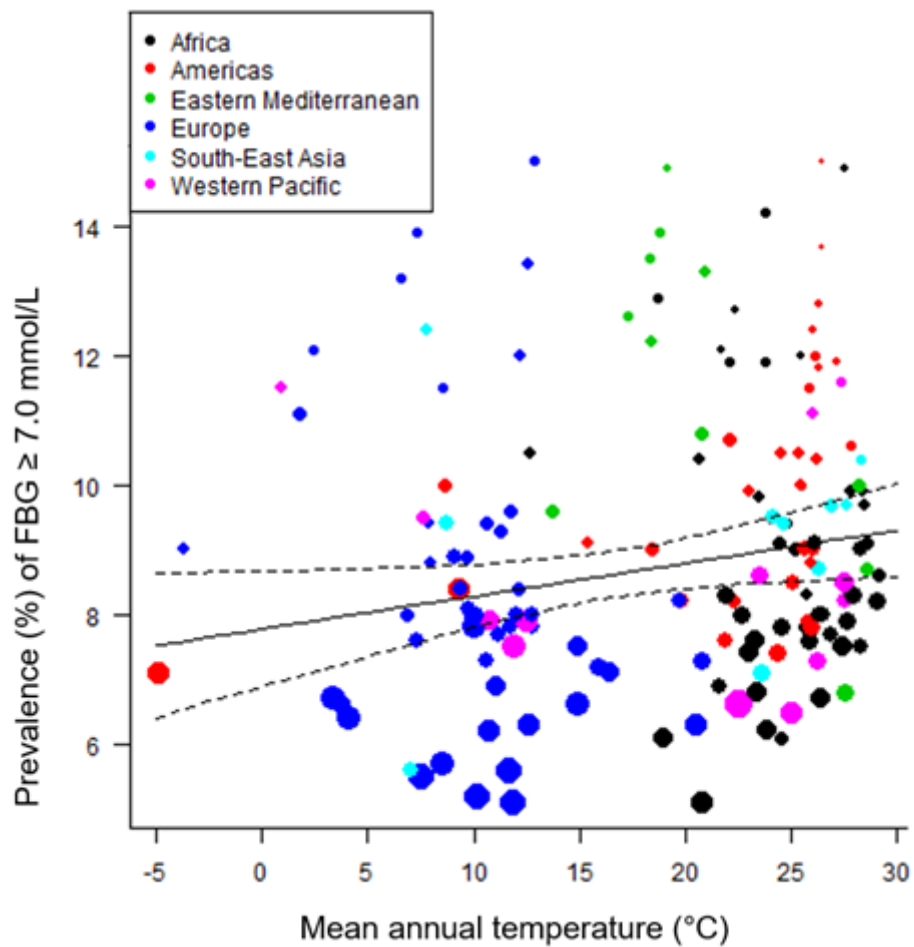

Colours indicate the six World Health Organization regions.<sup>1</sup> The size of each circle is inversely proportional to the standard error of the estimate of the prevalence of raised fasting blood glucose. FBG, fasting blood glucose.

## References

1. Li Z, Wang Y, van der Sluis RJ, et al. Niacin reduces plasma CETP levels by diminishing liver macrophage content in CETP transgenic mice. *Biochemical pharmacology* 2012; **84**(6): 821-9.
